# Supplementary material
Source: PubMed Central journal article supplement (PMC7461156)
Supplement: NIHMS1611212-supplement-2.pdf [file NIHMS1611212-supplement-2.pdf]

## Supplement 2

### Data for Figure 4

4a)

|               |                         | Rater responses |                  |               |               |         |           |          | Total no of responses |
|---------------|-------------------------|-----------------|------------------|---------------|---------------|---------|-----------|----------|-----------------------|
|               |                         | Solid flames    | Irregular flames | BB-monotonous | NB-monotonous | Stripes | Low Power | Artifact |                       |
| Gold Standard | <b>Solid flames</b>     | 141             | 15               | 0             | 0             | 1       | 0         | 3        | <b>160</b>            |
|               | <b>Irregular flames</b> | 20              | 128              | 23            | 7             | 5       | 28        | 9        | <b>220</b>            |
|               | <b>BB-monotonous</b>    | 0               | 24               | 145           | 24            | 0       | 14        | 2        | <b>210</b>            |
|               | <b>NB-monotonous</b>    | 2               | 12               | 38            | 169           | 16      | 18        | 4        | <b>259</b>            |
|               | <b>Stripes</b>          | 4               | 18               | 8             | 22            | 8       | 180       | 9        | <b>249</b>            |
|               | <b>Low Power</b>        | 0               | 2                | 1             | 18            | 64      | 5         | 10       | <b>100</b>            |
|               | <b>Artifact</b>         | 0               | 7                | 3             | 3             | 2       | 4         | 31       | <b>50</b>             |

Data used to generate agreement matrix (Figure 4a in the main text) is shown. The “gold standard” or correct response for spectrogram patterns was determined by the most common response or responses (if multiple patterns were equally selected) for each spectrogram in the survey. The gold standard is shown in the first column in bold. The table shows the number of times each spectrogram pattern was chosen by the raters for the corresponding gold standard pattern. The final column shows the total number of responses for each gold standard pattern. Note there were 2 missing responses (one for NB-monotonous, and one for Stripes).

BB-monotonous: Broadband-monotonous; NB-monotonous: Narrowband-monotonous

4b)

|               |          | Rater responses |     |     |      |      |          |          |     |          |          | Total no of responses |       |
|---------------|----------|-----------------|-----|-----|------|------|----------|----------|-----|----------|----------|-----------------------|-------|
|               |          | Seizure         | LPD | GPD | LRDA | GRDA | Foc slow | Gen slow | BS  | Gen Supp | Artifact |                       | Other |
| Gold Standard | Seizure  | 47              | 10  | 3   | 11   | 0    | 0        | 0        | 1   | 0        | 4        | 4                     | 80    |
|               | LPD      | 5               | 146 | 2   | 12   | 0    | 6        | 1        | 0   | 1        | 4        | 3                     | 180   |
|               | GPD      | 1               | 4   | 33  | 0    | 0    | 0        | 0        | 0   | 0        | 0        | 2                     | 40    |
|               | LRDA     | 5               | 1   | 0   | 17   | 3    | 2        | 1        | 0   | 0        | 0        | 1                     | 30    |
|               | GRDA     | 0               | 0   | 0   | 1    | 18   | 1        | 0        | 0   | 0        | 0        | 0                     | 20    |
|               | Foc slow | 2               | 6   | 0   | 8    | 0    | 63       | 10       | 2   | 0        | 10       | 9                     | 110   |
|               | Gen Slow | 2               | 1   | 1   | 3    | 22   | 16       | 179      | 5   | 27       | 5        | 9                     | 270   |
|               | BS       | 0               | 3   | 7   | 0    | 0    | 0        | 0        | 101 | 5        | 0        | 4                     | 130   |
|               | Gen supp | 0               | 2   | 0   | 0    | 0    | 0        | 16       | 3   | 191      | 7        | 0                     | 220   |
|               | Artifact | 3               | 1   | 1   | 1    | 1    | 4        | 8        | 7   | 2        | 72       | 10                    | 110   |
|               | Other    | 3               | 0   | 0   | 1    | 0    | 0        | 0        | 0   | 0        | 3        | 3                     | 100   |

Data used to generate agreement matrix (Figure 4b in the main text) is shown. The “gold standard” or correct response for raw EEG patterns was determined by the most common response or responses (if multiple patterns were equally selected) for each raw EEG image in the survey. The gold standard is shown in the first column in bold. The table shows the number of times each raw EEG pattern was chosen by the raters for the corresponding gold standard pattern. The final column shows the total number of responses for each gold standard pattern.

BS: burst suppression; Foc slow: focal slowing; Gen slow: generalized slowing; Gen supp: generalized suppression; GPD: generalized periodic discharge; GRDA: generalized rhythmic delta activity; LPD: lateralized periodic discharges; LRDA: lateralized rhythmic delta activity

4c)

|                      |                         | Rater responses |              |          |                 |    |          |          |       |                       |
|----------------------|-------------------------|-----------------|--------------|----------|-----------------|----|----------|----------|-------|-----------------------|
|                      |                         | Sz/IIC          | Seizure only | IIC only | Foc/gen slowing | BS | Gen Supp | Artifact | Other | Total no of responses |
| <b>Gold Standard</b> | <b>Solid Flames</b>     | 111             | 53           | 58       | 31              | 5  | 1        | 4        | 8     | <b>160</b>            |
|                      | <b>Irregular Flames</b> | 85              | 1            | 84       | 71              | 6  | 13       | 34       | 11    | <b>220</b>            |
|                      | <b>BB-Monotonous</b>    | 114             | 5            | 109      | 69              | 0  | 0        | 17       | 10    | <b>210</b>            |
|                      | <b>NB-Monotonous</b>    | 63              | 0            | 63       | 114             | 14 | 61       | 3        | 5     | <b>260</b>            |
|                      | <b>Strips</b>           | 17              | 0            | 17       | 44              | 93 | 86       | 5        | 5     | <b>250</b>            |
|                      | <b>Low Power</b>        | 0               | 0            | 0        | 1               | 0  | 94       | 5        | 0     | <b>100</b>            |
|                      | <b>Artifact</b>         | 1               | 0            | 1        | 2               | 3  | 10       | 33       | 1     | <b>50</b>             |

Data used to generate agreement matrix (Figure 4c in the main text) is shown. The “gold standard” or correct response for spectrogram patterns was determined by the most common response or responses (if multiple patterns were equally selected) for each spectrogram in the survey. The gold standard is shown in the first column in bold. The table shows the number of times each raw EEG pattern was chosen by the raters for the corresponding gold standard spectrogram pattern. The final column shows the total number of responses for each gold standard pattern.

BB: broadband; BS: burst suppression; Foc slow: focal slowing; Gen slow: generalized slowing; Gen supp: generalized suppression; GPD: generalized periodic discharge; GRDA: generalized rhythmic delta activity; IIC: Ictal-interictal; LPD: lateralized periodic discharges; LRDA: lateralized rhythmic delta activity; NB: narrowband; SZ: seizures

## Fagan's nomogram

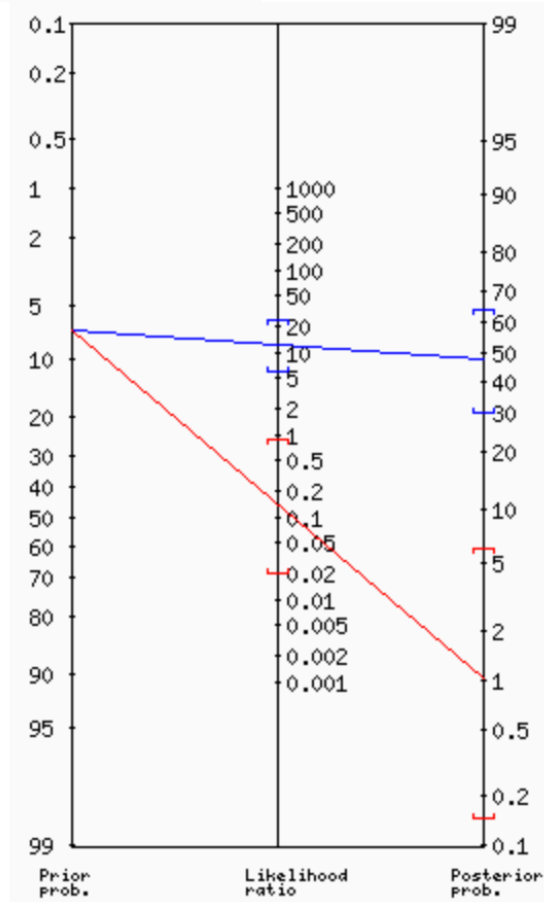

Prior probability (odds): 7% (0.1)

### POSITIVE TEST:

Positive Likelihood ratio: 12  
 95% confidence interval: [5.72,24]  
 Posterior probability (odds): 47% (0.9)  
 95% confidence interval: [30%,64%]  
 (~ 1 in 2.1 with positive test are sick)

### NEGATIVE TEST:

Negative Likelihood ratio: 0.14  
 95% confidence interval: [0.02,0.85]  
 Posterior probability (odds): 1% (0.0)  
 95% confidence interval: [0%,6%]  
 (~ 1 in 1.0 with negative test are well)

|               | Seizure + | Seizure - |     |
|---------------|-----------|-----------|-----|
| Solid flame + | 7         | 8         | 15  |
| Solid flame - | 1         | 99        | 100 |
|               | 8         | 107       | 115 |

The figure shows the Fagan's nomogram for computation of pre and post test probability. Solid flames had a sensitivity of 87.5 (7/8) and specificity of 92.5% (99/107) for the detection of seizures. The positive likelihood ratio (LR+) was 12 and the overall accuracy of solid flames for detection of seizures was 92.2%. The pre-test probability of seizures was 7% and post-test probability was 47%.
